# Supplementary material for: TOP2A Amplification and Overexpression in Hepatocellular Carcinoma Tissues
Source: Hindawi journal article supplement (doi:10.1155/2015/381602), 2015-01-01
Supplement: f1 [file 381602.f1.pdf]

**Table 1.** HER2 gene and CEP 17 copy number in 22 pairs of HCC tissues and matched non-tumor tissues

| No. | Case | Matched non-tumor tissues |       |       | HCC tissues |       |       |
|-----|------|---------------------------|-------|-------|-------------|-------|-------|
|     |      | Cep17                     | Her-2 | Ratio | Cep17       | Her-2 | Ratio |
| 1   | 7    | 1.83                      | 2.19  | 1.19  | 2.79        | 2.8   | 1.00  |
| 2   | 10   | 2.39                      | 2.75  | 1.15  | 6.65        | 6.87  | 1.03  |
| 3   | 14   | 1.94                      | 2     | 1.03  | 1.98        | 2.04  | 1.03  |
| 4   | 15   | 2.01                      | 2.09  | 1.03  | 3.55        | 3.66  | 1.03  |
| 5   | 17   | 1.95                      | 2.43  | 1.24  | 3.78        | 3.85  | 1.01  |
| 6   | 19   | 1.93                      | 1.99  | 1.03  | 3.54        | 3.63  | 1.02  |
| 7   | 20   | 2.55                      | 2.6   | 1.01  | 2.84        | 3.18  | 1.11  |
| 8   | 21   | 1.97                      | 2.03  | 1.03  | 4.32        | 4.46  | 1.03  |
| 9   | 24   | 2.18                      | 2.21  | 1.01  | 2.25        | 2.29  | 1.01  |
| 10  | 25   | 2.27                      | 2.39  | 1.05  | 2.57        | 2.58  | 1.00  |
| 11  | 29   | 2.6                       | 2.98  | 1.14  | 2.71        | 2.74  | 1.01  |
| 12  | 31   | 2                         | 2.17  | 1.08  | 3.42        | 3.56  | 1.04  |
| 13  | 32   | 2.07                      | 2.36  | 1.14  | 4.53        | 3.03  | 0.66  |
| 14  | 33   | 1.9                       | 2.15  | 1.13  | 2.06        | 2.12  | 1.02  |
| 15  | 34   | 1.96                      | 2.18  | 1.11  | 11.06       | 8.09  | 0.73  |
| 16  | 35   | 1.91                      | 2.07  | 1.08  | 2.45        | 3.52  | 1.43  |
| 17  | 36   | 1.96                      | 2.18  | 1.11  | 2.82        | 3.1   | 1.09  |
| 18  | 37   | 1.8                       | 1.95  | 1.08  | 4.12        | 4.12  | 1.00  |
| 19  | 38   | 2.24                      | 2.47  | 1.10  | 2.1         | 2.1   | 1.00  |
| 20  | 39   | 2.1                       | 2.35  | 1.11  | 3.24        | 3.45  | 1.06  |
| 21  | 40   | 2.04                      | 2.61  | 1.27  | 3.31        | 3.61  | 1.09  |
| 22  | 42   | 1.95                      | 2.01  | 1.03  | 2.04        | 2.03  | 0.99  |

Cep 17 = copy number of chromosome 17 centromere by FISH; CEP17  $\geq 3$  = Gain of chromosome 17 centromere;

Her-2 = copy number of HER2 by FISH

Ratio = HER2/Cep17 ratio; Ratio  $\leq 0.8$  = HER2 gene deletion

0.8 < Ratio < 1.8 = HER2 non-amplified

1.8  $\leq$  Ratio < 2.2 = HER2 equivocal

Ratio  $\geq 2.2$ . = HER2 amplified (positive)
