# Supplementary material for: TOP2A Amplification and Overexpression in Hepatocellular Carcinoma Tissues
Source: Hindawi journal article supplement (doi:10.1155/2015/381602), 2015-01-01
Supplement: f2 [file 381602.f2.pdf]

**Table2.** TOP2A gene and CEP17 copy number in 22 pair of HCC tissues and matched non-tumor tissues

| No. | Case | Matched non-tumor tissues |       |       | HCC tissues |       |       |
|-----|------|---------------------------|-------|-------|-------------|-------|-------|
|     |      | Cep17                     | TOP2A | Ratio | Cep17       | TOP2A | Ratio |
| 1   | 7    | 1.83                      | 2.07  | 1.13  | 3.67        | 3.80  | 1.03  |
| 2   | 10   | 2.20                      | 2.29  | 1.04  | 7.00        | 7.77  | 1.11  |
| 3   | 14   | 2.0                       | 2.13  | 1.07  | 1.93        | 2.00  | 1.04  |
| 4   | 15   | 1.84                      | 2.09  | 1.14  | 3.72        | 3.90  | 1.05  |
| 5   | 17   | 1.87                      | 2.57  | 1.37  | 3.13        | 3.51  | 1.12  |
| 6   | 19   | 2.00                      | 2.09  | 1.05  | 3.58        | 3.84  | 1.07  |
| 7   | 20   | 2.60                      | 3.68  | 1.42  | 3.74        | 4.10  | 1.10  |
| 8   | 21   | NA                        | NA    | NA    | 4.48        | 4.8   | 1.07  |
| 9   | 24   | 2.34                      | 3.03  | 1.29  | 2.21        | 2.71  | 1.23  |
| 10  | 25   | 2.00                      | 2.00  | 1.00  | 2.42        | 2.59  | 1.07  |
| 11  | 29   | 2.43                      | 2.92  | 1.20  | 3.29        | 3.97  | 1.21  |
| 12  | 31   | 2.34                      | 2.66  | 1.14  | 4.07        | 4.07  | 1.00  |
| 13  | 32   | 1.88                      | 2.20  | 1.17  | 4.76        | 3.04  | 0.64  |
| 14  | 33   | NA                        | NA    | NA    | NA          | NA    | NA    |
| 15  | 34   | 1.97                      | 2.11  | 1.07  | 12.33       | 8.00  | 0.65  |
| 16  | 35   | 1.89                      | 2.00  | 1.06  | 2.66        | 4.11  | 1.54  |
| 17  | 36   | NA                        | NA    | NA    | 2.37        | 2.46  | 1.04  |
| 18  | 37   | 2.12                      | 2.34  | 1.10  | 3.97        | 4.19  | 1.05  |
| 19  | 38   | 2.78                      | 2.50  | 0.9   | 1.97        | 2.15  | 1.09  |
| 20  | 39   | NA                        | NA    | NA    | NA          | NA    | NA    |
| 21  | 40   | 1.99                      | 2.48  | 1.25  | 2.92        | 3.34  | 1.14  |
| 22  | 42   | 1.92                      | 2.04  | 1.06  | 2.10        | 2.32  | 1.10  |

NA = not available

Cep 17 = copy number of chromosome 17 centromere by FISH; CEP17  $\geq 3$  = Gain of chromosome 17 centromere;

TOP2A = copy number of TOP2A by FISH

Ratio = TOP2A/Cep17 ratio; Ratio  $\leq 0.8$  = TOP2A gene deletion

0.8 < Ratio < 2 = TOP2A non-amplified

Ratio  $\geq 2$  = TOP2A amplified (positive)
